# Supplementary material for: Effects of a Lifestyle Intervention in Routine Care on Short- and Long-Term Maternal Weight Retention and Breastfeeding Behavior—12 Months Follow-up of the Cluster-Randomized GeliS Trial
Source: J Clin Med. 2019 Jun 19;8(6):876. doi: 10.3390/jcm8060876 (PMC6616390; doi:10.3390/jcm8060876)
Supplement: Supplementary file 1 [file jcm-08-00876-s001.pdf]

**Table S1:** Characteristics of women entering the follow-up compared to women lost to follow-up.

|                                          | Participants in 12 months follow-up |                              |                             | Lost to follow-up                 |                              |                            |
|------------------------------------------|-------------------------------------|------------------------------|-----------------------------|-----------------------------------|------------------------------|----------------------------|
|                                          | Intervention<br>( <i>n</i> = 902)   | Control<br>( <i>n</i> = 881) | Total<br>( <i>n</i> = 1783) | Intervention<br>( <i>n</i> = 101) | Control<br>( <i>n</i> = 114) | Total<br>( <i>n</i> = 215) |
| <b>Maternal characteristics</b>          |                                     |                              |                             |                                   |                              |                            |
| Pre-pregnancy age, years <sup>a</sup>    | 30.4 ± 4.2                          | 30.6 ± 4.5                   | 30.5 ± 4.4                  | 29.0 ± 4.6                        | 29.0 ± 5.0                   | 29.0 ± 4.8                 |
| Pre-pregnancy weight, kg                 | 68.6 ± 13.1                         | 68.0 ± 13.5                  | 68.3 ± 13.3                 | 66.0 ± 11.5                       | 68.1 ± 15.0                  | 67.1 ± 13.5                |
| First measured weight, kg                | 70.1 ± 13.2                         | 68.9 ± 13.8                  | 69.5 ± 13.5                 | 67.4 ± 11.6                       | 69.1 ± 15.0                  | 68.3 ± 13.5                |
| Pre-pregnancy BMI, kg/m <sup>2</sup>     | 24.4 ± 4.3                          | 24.3 ± 4.6                   | 24.4 ± 4.5                  | 24.0 ± 3.9                        | 24.5 ± 4.7                   | 24.2 ± 4.4                 |
| <b>Pre-pregnancy BMI category, n (%)</b> |                                     |                              |                             |                                   |                              |                            |
| BMI 18.5–24.9 kg/m <sup>2</sup>          | 578/902 (64.1%)                     | 577/881 (65.5%)              | 1155/1783 (64.8%)           | 67/101 (66.3%)                    | 75/114 (65.8%)               | 142/215 (66.0%)            |
| BMI 25.0–29.9 kg/m <sup>2</sup>          | 217/902 (24.1%)                     | 194/881 (22.0%)              | 411/1783 (23.1%)            | 26/101 (25.7%)                    | 24/114 (21.1%)               | 50/215 (23.3%)             |
| BMI 30.0–40.0 kg/m <sup>2</sup>          | 107/902 (11.9%)                     | 110/881 (12.5%)              | 217/1783 (12.2%)            | 8/101 (7.9%)                      | 15/114 (13.2%)               | 23/215 (10.7%)             |
| GWG, kg                                  | 14.0 ± 5.2                          | 14.0 ± 5.2                   | 14.0 ± 5.2                  | 13.4 ± 5.5                        | 13.1 ± 5.7                   | 13.2 ± 5.6                 |
| GDM, n (%)                               | 89/887 (10.0%)                      | 82/832 (9.9%)                | 171/1719 (9.9%)             | 9/97 (9.3%)                       | 22/107 (20.6%)               | 31/204 (15.2%)             |
| <b>Educational level</b>                 |                                     |                              |                             |                                   |                              |                            |
| General secondary school                 | 120/901 (13.3%)                     | 140/880 (15.9%)              | 260/1781 (14.6%)            | 31/101 (30.7%)                    | 24/112 (21.4%)               | 55/213 (25.8%)             |
| Intermediate secondary school            | 392/901 (43.5%)                     | 363/880 (41.3%)              | 755/1781 (42.4%)            | 43/101 (42.6%)                    | 50/112 (44.6%)               | 93/213 (43.7%)             |
| High school                              | 389/901 (43.2%)                     | 377/880 (42.8%)              | 766/19781 (43.0%)           | 27/101 (26.7%)                    | 38/112 (33.9%)               | 65/213 (30.5%)             |
| <b>Country of birth, n (%)</b>           |                                     |                              |                             |                                   |                              |                            |
| Germany                                  | 801/902 (88.8%)                     | 798/880 (90.7%)              | 1599/1782 (89.7%)           | 88/101 (87.1%)                    | 88/112 (78.6%)               | 176/213 (82.6%)            |
| Others                                   | 101/902 (11.2%)                     | 82/880 (9.3%)                | 183/1782 (10.3%)            | 13/101 (12.9%)                    | 24/112 (21.4%)               | 37/213 (17.4%)             |
| Primiparous, n (%)                       | 568/902 (63.0%)                     | 477/881 (54.1%)              | 1045/1783 (58.6%)           | 52/101 (51.5%)                    | 52/114 (45.6%)               | 104/215 (48.4%)            |
| Smoking in late pregnancy, n (%)         | 35/864 (4.1%)                       | 37/845 (4.4%)                | 72/1709 (4.2%)              | 6/88 (6.8%)                       | 13/93 (14.0%)                | 19/181 (10.5%)             |

Abbreviations: GDM: Gestational diabetes mellitus; GWG: Gestational weight gain.

<sup>a</sup> mean ± SD (all such values)

**Table S2:** Sensitivity analyses on short-term and long-term PPWR.

|                                        | Intervention           | Control   | Effect size<br>(95% CI) | p     | Adjusted effect<br>size <sup>d</sup> (95% CI) <sup>f</sup> | Adjusted<br>p <sup>f</sup> |
|----------------------------------------|------------------------|-----------|-------------------------|-------|------------------------------------------------------------|----------------------------|
| <b>Short-term PPWR–T1<sub>pp</sub></b> |                        |           |                         |       |                                                            |                            |
| <b>PPWR, kg, model 1<sup>b</sup></b>   | 4.0 ± 4.8 <sup>a</sup> | 4.3 ± 4.8 | -0.12 (-0.94, 0.71)     | 0.783 | -0.16 (-0.95, 0.63)                                        | 0.694                      |
| <b>PPWR, kg, model 2<sup>c</sup></b>   | 4.0 ± 4.8              | 4.3 ± 4.8 | -0.12 (-0.94, 0.71)     | 0.782 | -0.18 (-0.97, 0.61)                                        | 0.662                      |
| <b>Long-term PPWR–T2<sub>pp</sub></b>  |                        |           |                         |       |                                                            |                            |
| <b>PPWR, kg, model 1<sup>d</sup></b>   | -0.2 ± 4.8             | 0.6 ± 5.2 | -0.63 (-1.44, 0.19)     | 0.132 | -0.69 (-1.57, 0.19)                                        | 0.123                      |
| <b>PPWR, kg, model 2<sup>e</sup></b>   | -0.2 ± 4.8             | 0.6 ± 5.2 | -0.61 (-1.44, 0.21)     | 0.146 | -0.68 (-1.57, 0.21)                                        | 0.133                      |

Abbreviations: GEE: generalized estimating equations; T1<sub>pp</sub>: 6-8 weeks pp; T2<sub>pp</sub>: 12<sup>th</sup> month pp; p: p value; pp: postpartum; PPWR: pp weight retention; V0: Visit 0 and time of recruitment.

<sup>a</sup> Mean ± SD (all such values).

<sup>b</sup> Included are all women with available weight data for T1<sub>pp</sub>. Self-reported pre-pregnancy weight was used if the measured weight at V0 was missing (IV: *n* = 973; C: *n* = 934).

<sup>c</sup> Included are all women with available measured weight data for T1<sub>pp</sub> (IV: *n* = 964; C: *n* = 917).

<sup>d</sup> Excluded are pregnant women and women lost to follow-up. Self-reported pre-pregnancy weight was used if the measured weight at V0 was missing (IV: *n* = 843; C: *n* = 832).

<sup>e</sup> Excluded are pregnant women, women lost to follow-up and women with missing measured weight data at V0 (IV: *n* = 839; C: *n* = 817).

<sup>f</sup> Linear regression models fit using GEEs adjusted for pre-pregnancy BMI, pre-pregnancy age, parity, gestational age at inclusion, time of the pp weight assessment (T1<sub>pp</sub> or T2<sub>pp</sub>).

**Table S3:** Factors influencing the decision to breastfeed (any breastfeeding).

|                                                          | Any Breastfeeding |      | No breastfeeding |      | Effect size<br>(95% CI) | P                 | Adjusted effect size<br>(95% CI) | Adjusted p        |
|----------------------------------------------------------|-------------------|------|------------------|------|-------------------------|-------------------|----------------------------------|-------------------|
|                                                          | <i>n</i>          | %    | <i>n</i>         | %    |                         |                   |                                  |                   |
| <b>Pre-pregnancy BMI category<sup>a</sup></b>            |                   |      |                  |      |                         | <b>0.002</b>      |                                  | <b>0.002</b>      |
| BMI 18.5–24.9 kg/m <sup>2</sup>                          | 924/1066          | 86.7 | 142/1066         | 13.3 | Reference               |                   | Reference                        |                   |
| BMI 25.0–29.9 kg/m <sup>2</sup>                          | 313/372           | 84.1 | 59/372           | 15.9 | 0.82 (0.59, 1.13)       | 0.225             | 0.83 (0.59, 1.15)                | 0.259             |
| BMI 30.0–40.0 kg/m <sup>2</sup>                          | 149/194           | 76.8 | 45/194           | 23.2 | 0.51 (0.35, 0.74)       | < 0.001           | 0.51 (0.35, 0.74)                | < 0.001           |
| <b>Age categories (pre-pregnancy)<sup>b</sup></b>        |                   |      |                  |      |                         | <b>0.337</b>      |                                  | <b>0.259</b>      |
| 18–25 years                                              | 158/194           | 81.4 | 36/194           | 18.6 | Reference               |                   | Reference                        |                   |
| 26–35 years                                              | 1051/1229         | 85.5 | 178/1229         | 14.5 | 1.35 (0.91, 2.00)       | 0.141             | 1.40 (0.93, 2.09)                | 0.105             |
| 36–43 years                                              | 176/208           | 84.6 | 32/208           | 15.4 | 1.25 (0.74, 2.11)       | 0.397             | 1.42 (0.82, 2.45)                | 0.210             |
| <b>Educational level<sup>c</sup></b>                     |                   |      |                  |      |                         | <b>&lt; 0.001</b> |                                  | <b>&lt; 0.001</b> |
| General secondary school                                 | 154/215           | 71.6 | 61/215           | 28.4 | Reference               |                   | Reference                        |                   |
| Intermediate secondary school                            | 567/693           | 81.8 | 126/693          | 18.2 | 1.78 (1.25, 2.54)       | 0.001             | 1.71 (1.19, 2.45)                | 0.004             |
| High school                                              | 664/723           | 91.8 | 59/723           | 8.2  | 4.46 (2.99, 6.64)       | < 0.001           | 4.08 (2.70, 6.15)                | < 0.001           |
| <b>Excessive GWG according to the IOM<sup>c, d</sup></b> |                   |      |                  |      |                         | <b>0.273</b>      |                                  | <b>0.690</b>      |
| Non-excessive GWG                                        | 720/832           | 86.5 | 112/832          | 13.5 | Reference               |                   | Reference                        |                   |
| Excessive GWG                                            | 586/693           | 84.6 | 107/693          | 15.4 | 0.85 (0.64, 1.14)       | 0.273             | 0.94 (0.69, 1.28)                | 0.690             |
| <b>Antenatal well-being<sup>c</sup></b>                  |                   |      |                  |      |                         | <b>0.007</b>      |                                  | <b>0.018</b>      |
| Moderate to high                                         | 882/1015          | 86.9 | 133/1015         | 13.1 | Reference               |                   | Reference                        |                   |
| Low                                                      | 459/561           | 81.8 | 102/561          | 18.2 | 0.68 (0.51, 0.90)       | 0.007             | 0.71 (0.53, 0.94)                | 0.018             |
| <b>PPD<sup>c</sup></b>                                   |                   |      |                  |      |                         | <b>&lt; 0.001</b> |                                  | <b>&lt; 0.001</b> |
| No                                                       | 1208/1401         | 86.2 | 193/1401         | 13.8 | Reference               |                   | Reference                        |                   |
| Yes                                                      | 97/133            | 72.9 | 36/133           | 27.1 | 0.43 (0.29, 0.65)       | < 0.001           | 0.45 (0.29, 0.68)                | < 0.001           |

Abbreviations: GWG: Gestational weight gain; IOM: Institute of Medicine; p: p value; pp: postpartum; PPD: pp depression;

T2<sub>pp</sub>: 12<sup>th</sup> month pp.<sup>a</sup> Binary logistic regression model adjusted for pre-pregnancy age, parity, group assignment, T2<sub>pp</sub>.<sup>b</sup> Binary logistic regression model adjusted for pre-pregnancy BMI, parity, group assignment, T2<sub>pp</sub>.<sup>c</sup> Binary logistic regression model adjusted for pre-pregnancy age, pre-pregnancy BMI, parity, group assignment, T2<sub>pp</sub>.<sup>d</sup> Excessive GWG as defined by the IOM [24].
